# Supplementary material for: Highly Sensitive Virome Characterization of Aedes aegypti and Culex pipiens Complex from Central Europe and the Caribbean Reveals Potential for Interspecies Viral Transmission
Source: MDPI journal article supplement (doi:10.3390/pathogens9090686), 2020-08-21
Supplement: s1 [file s1]

**Table S1;** Sequencing results, sequence separation and quality trimming

| ID             | Mosquito species<br>(pool size)      | Country of<br>origin | Latitude                                                 | Longitude  | Description              | date     |                   |                  |                                   |                      | BlastN            |                                                       |
|----------------|--------------------------------------|----------------------|----------------------------------------------------------|------------|--------------------------|----------|-------------------|------------------|-----------------------------------|----------------------|-------------------|-------------------------------------------------------|
|                |                                      |                      |                                                          |            |                          |          | raw read<br>pairs | trimmed<br>reads | assembled reads<br>(% of trimmed) | average<br>bp/contig | contigs<br>>500bp | contigs matched<br>database entries<br>(% of trimmed) |
| C.pip.cl_AUT_1 | <i>Culex pipiens</i><br>complex (50) | Austria              | 48.215766                                                | 16.413106  | casern, semi<br>rural    | 04.08.16 | 3.66E+06          | 5.16E+06         | 4.02E+06 (78)                     | 1,207                | 828               | 648 (78)                                              |
| C.pip.cl_AUT_2 |                                      | Austria              | 48.29397                                                 | 16.419941  | cortyard,<br>urban       | 17.08.16 | 1.41E+07          | 2.14E+07         | 4.14E+06 (19)                     | 621                  | 6.564             | 4688 (71)                                             |
| C.pip.cl_BRB   |                                      | Barbados             | 13.269393                                                | -59.624603 | private<br>garden, rural | 31.10.16 | 2.00E+06          | 2.69E+06         | 2.33E+06 (87)                     | 1,090                | 812               | 677 (83)                                              |
| Ae.ae_BRB      | <i>Aedes aegypti</i><br>(27)         | Barbados             | as reported previously in Thannesberger et.al. 2019 (18) |            |                          |          | 2.06E+06          | 3.34E+06         | 2.43E+06 (73)                     | 2.214                | 162               | 107 (66)                                              |
