# Supplementary material for: Highly Sensitive Virome Characterization of Aedes aegypti and Culex pipiens Complex from Central Europe and the Caribbean Reveals Potential for Interspecies Viral Transmission
Source: MDPI journal article supplement (doi:10.3390/pathogens9090686), 2020-08-21
Supplement: s1 [file s1]

Table S2: Land coverage, AUT\_01 and AUT\_02

| AUT_01               |                        |                   |          |
|----------------------|------------------------|-------------------|----------|
|                      | absolute area          | relative area (%) | summ (%) |
| natural state areas  | Waterbody- stream      | 0.567             | 14.3     |
|                      | Waterbody              | 0.279             | 7.1      |
|                      | Urban greenlands       | 0.917             | 23.2     |
|                      | Recreational area      | 0.534             | 13.5     |
| built-up state areas | Loosely built- up area | 1.141             | 28.9     |
|                      | Densely built- up area | 0.285             | 7.2      |
|                      | Industrial area        | 0.231             | 5.8      |
|                      | total                  | 3.954             | 100.0    |

| AUT_02               |                                 |                   |          |
|----------------------|---------------------------------|-------------------|----------|
|                      | absolute area                   | relative area (%) | summ (%) |
| natural state areas  | Viticulture                     | 0.065             | 1.6      |
|                      | Acreage                         | 1.066             | 26.9     |
|                      | Agriculture- natural vegetation | 0.339             | 8.6      |
| built-up state areas | Loosely built- up area          | 2.372             | 59.9     |
|                      | Densely built- up area          | 0.116             | 2.9      |
|                      | total                           | 3.958             | 100.0    |
