# Supplementary material for: Highly Sensitive Virome Characterization of Aedes aegypti and Culex pipiens Complex from Central Europe and the Caribbean Reveals Potential for Interspecies Viral Transmission
Source: MDPI journal article supplement (doi:10.3390/pathogens9090686), 2020-08-21
Supplement: s1 [file s1]

Figure S1

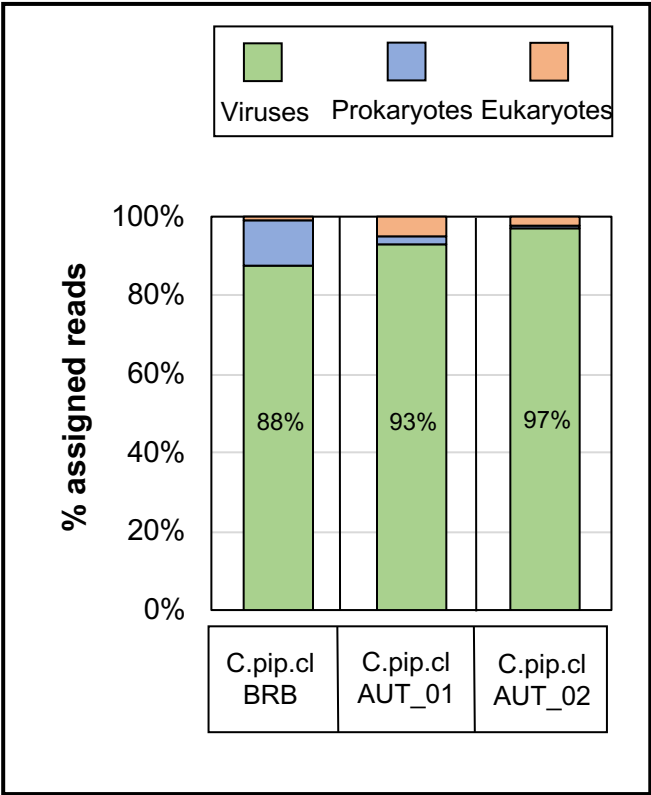

**Figure S1** Fraction of reads mapping on contigs classified as viruses, prokaryotes and eukaryotes.

Figure S2

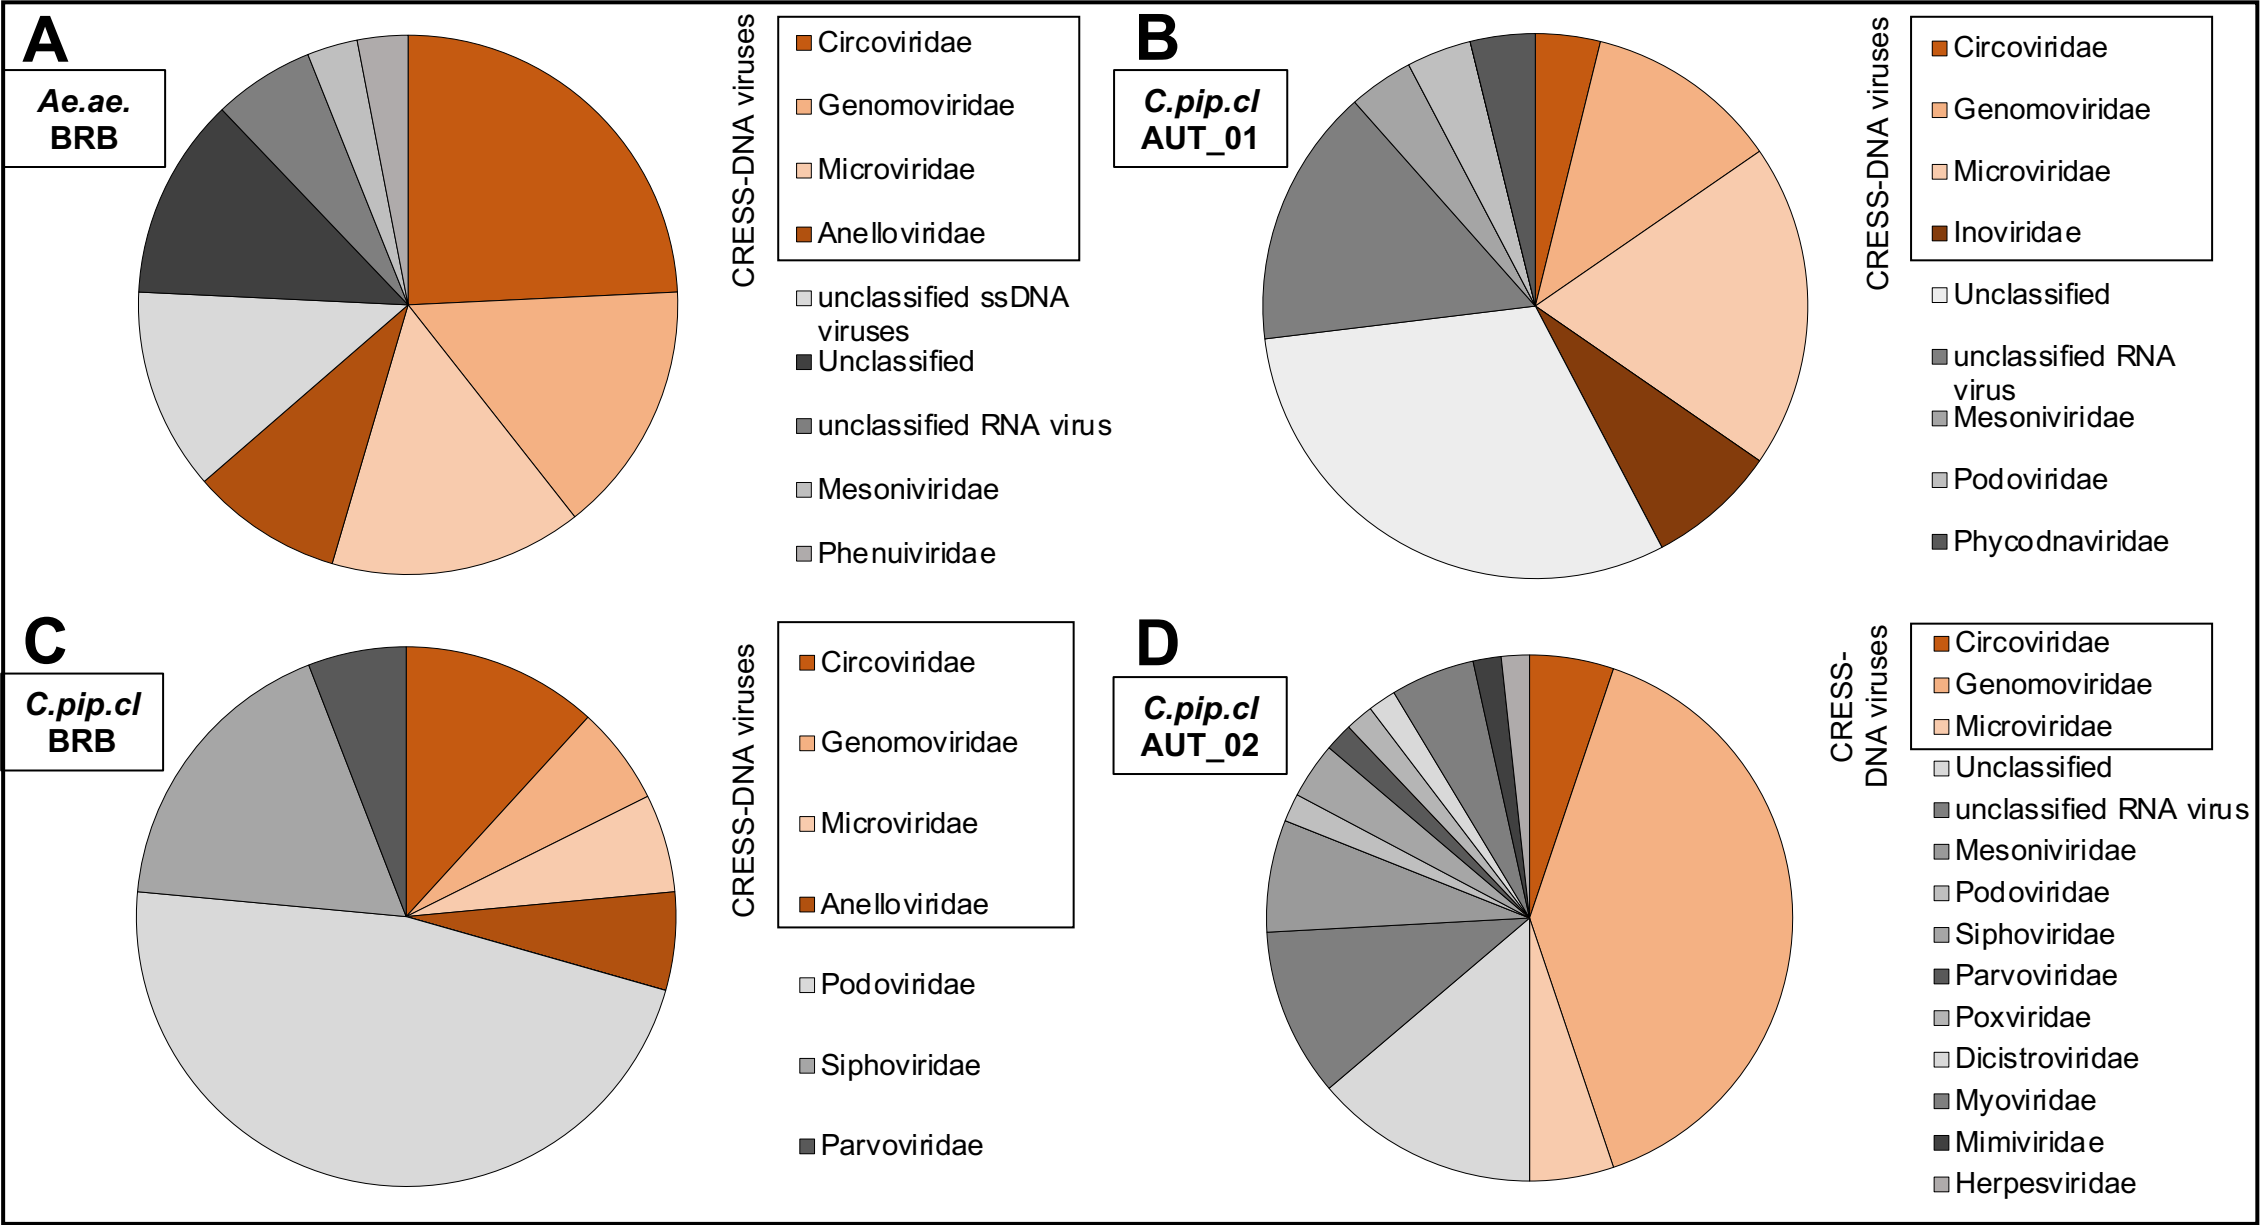

**Figure S2** Virome composition on taxonomic family level as number of hits to indicated clade; families of the group of circular rep encoding single stranded (CRESS)- DNA viruses are marked in shades of red;

Figure S3

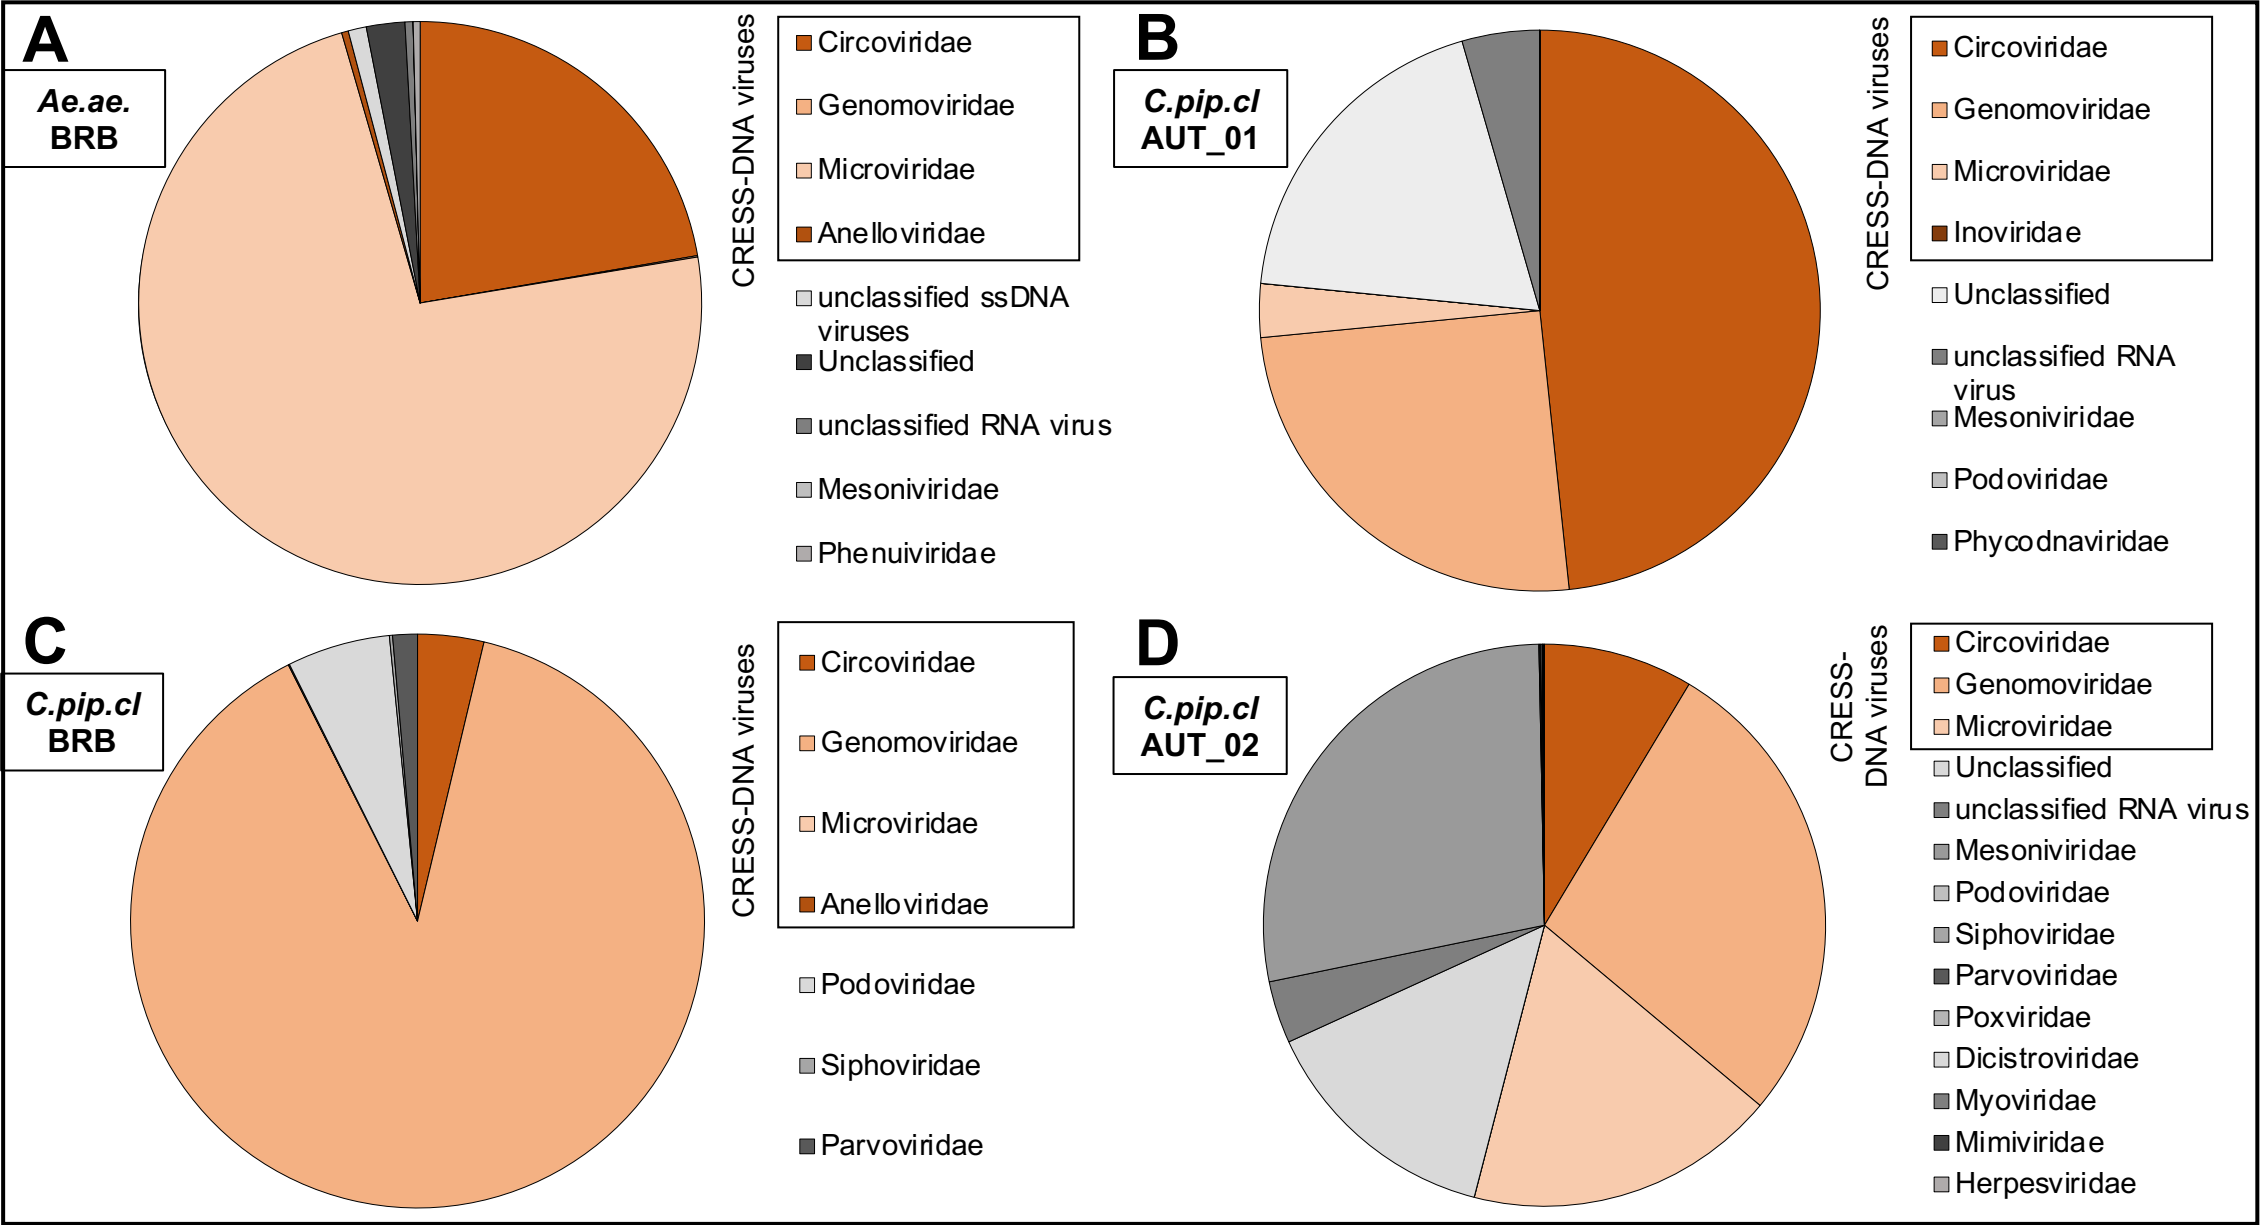

**Figure S3** Relative abundance of viral hits on taxonomic family level in RPKM; families of the group of circular rep encoding single stranded (CRESS)- DNA viruses are marked in shades of red;

**Figure S4**

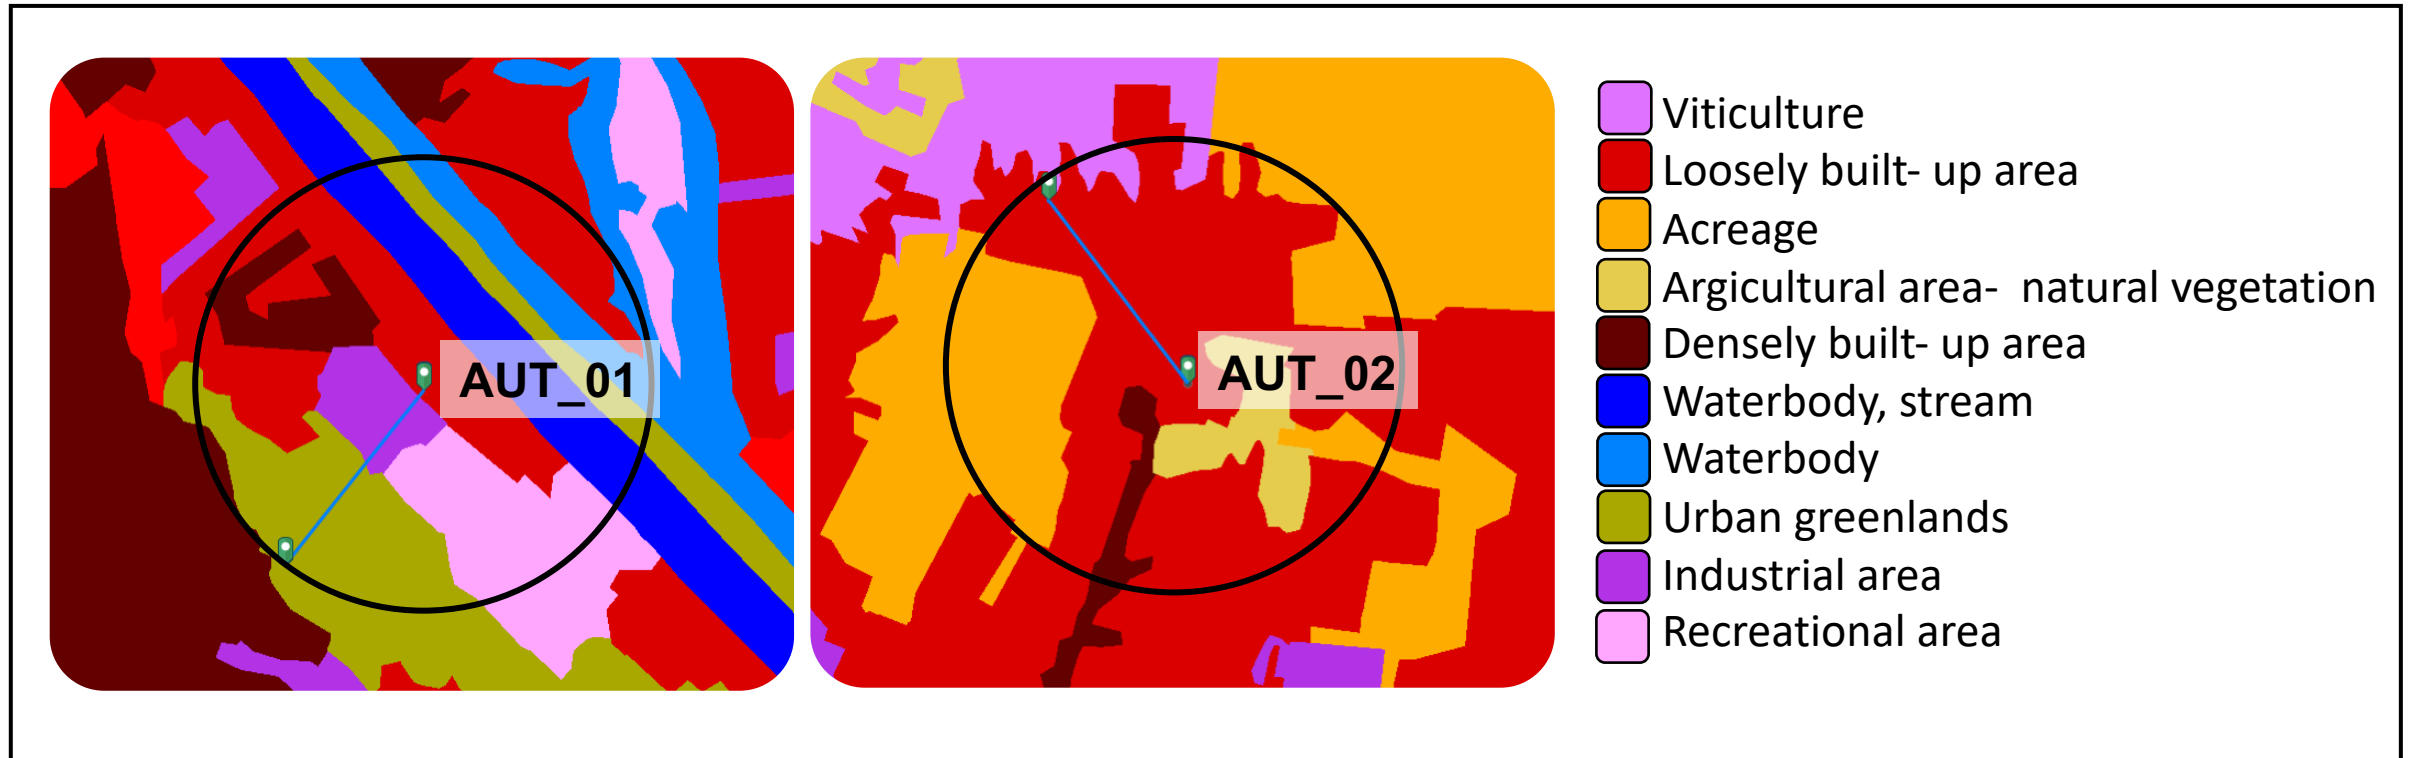

**Figure S4** Land coverage of Austrian collection spots AUT\_1 and AUT\_2; circle represents area covered by mean flight distance of 1.3 km from point of collection of *C.pipiens* complex mosquitoes (approx 1.33 km)

Figure S5

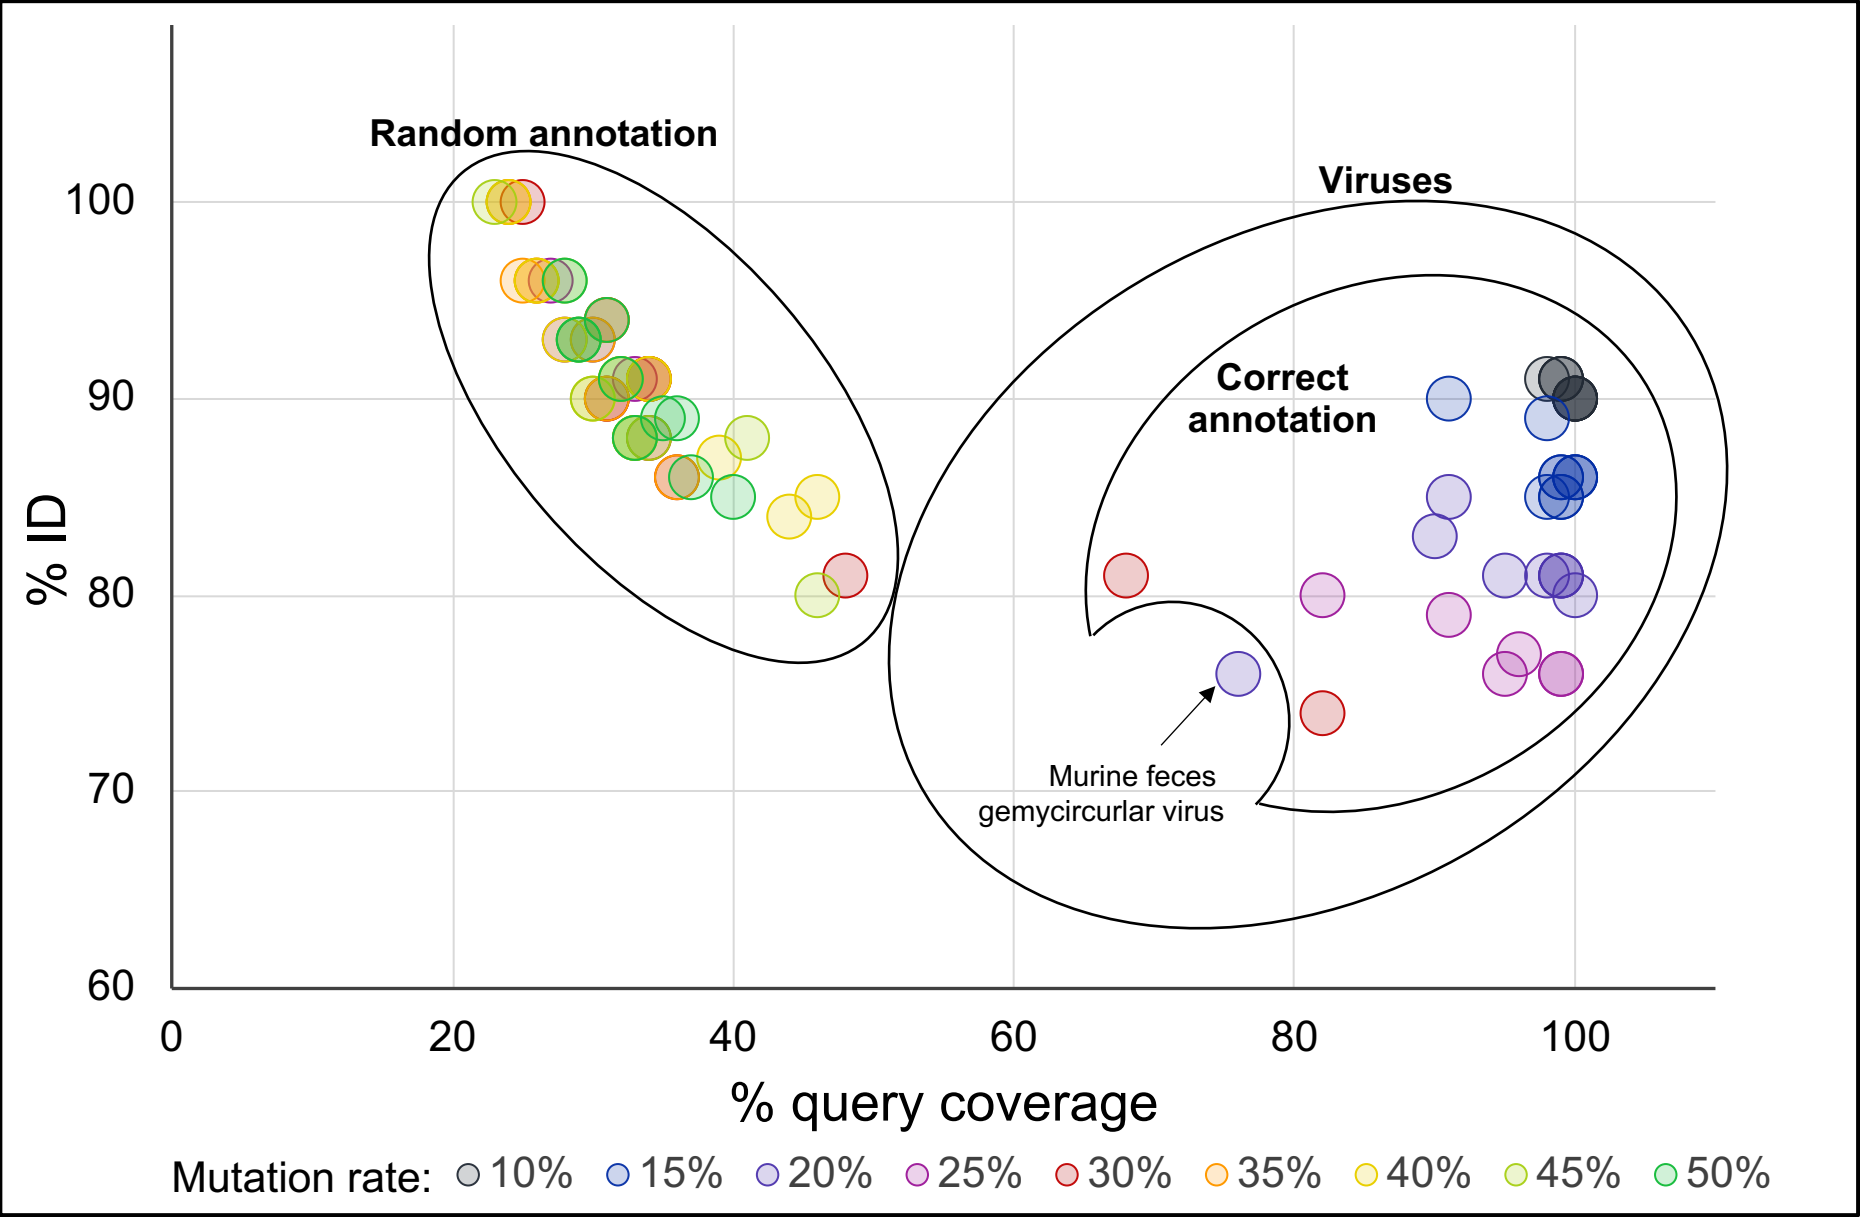

Figure S5 Goodness of alignment- fit of best BLAST N hits for for mutated model sequences

# Figure S6

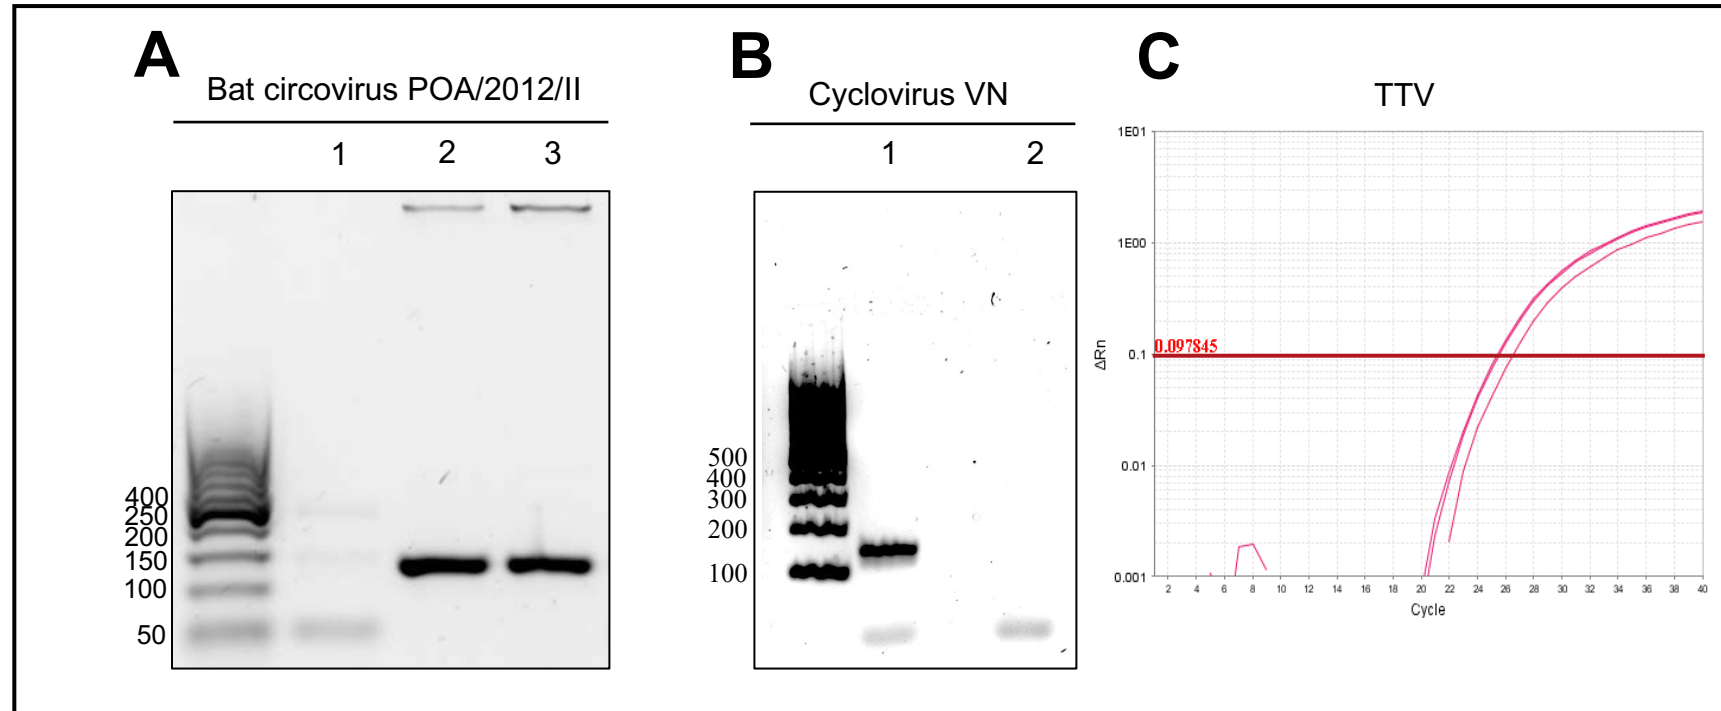

**Figure S6** Verification of metagenomic hits by **(A)** specific PCR assay designed to target a 132bp sequence (pos 965-1096) of Bat circovirus POA/2012/II (NC\_025791); lane 1: negative control; lane 2: *Ae.ae.* BRB; lane 3: *C.pip.cl.* BRB; **(B)** specific PCR assay designed to target a 160bp sequence (pos 574-714) of Cyclovirus VN isolate hcf1 (NC\_021707); lane 1: *Ae.ae.* BRB; lane 2: negative control; **(C)** specific taqMan rtPCR assay designed to target a conserved 63 bp sequence among human infecting TTV genome sequences

Figure S7

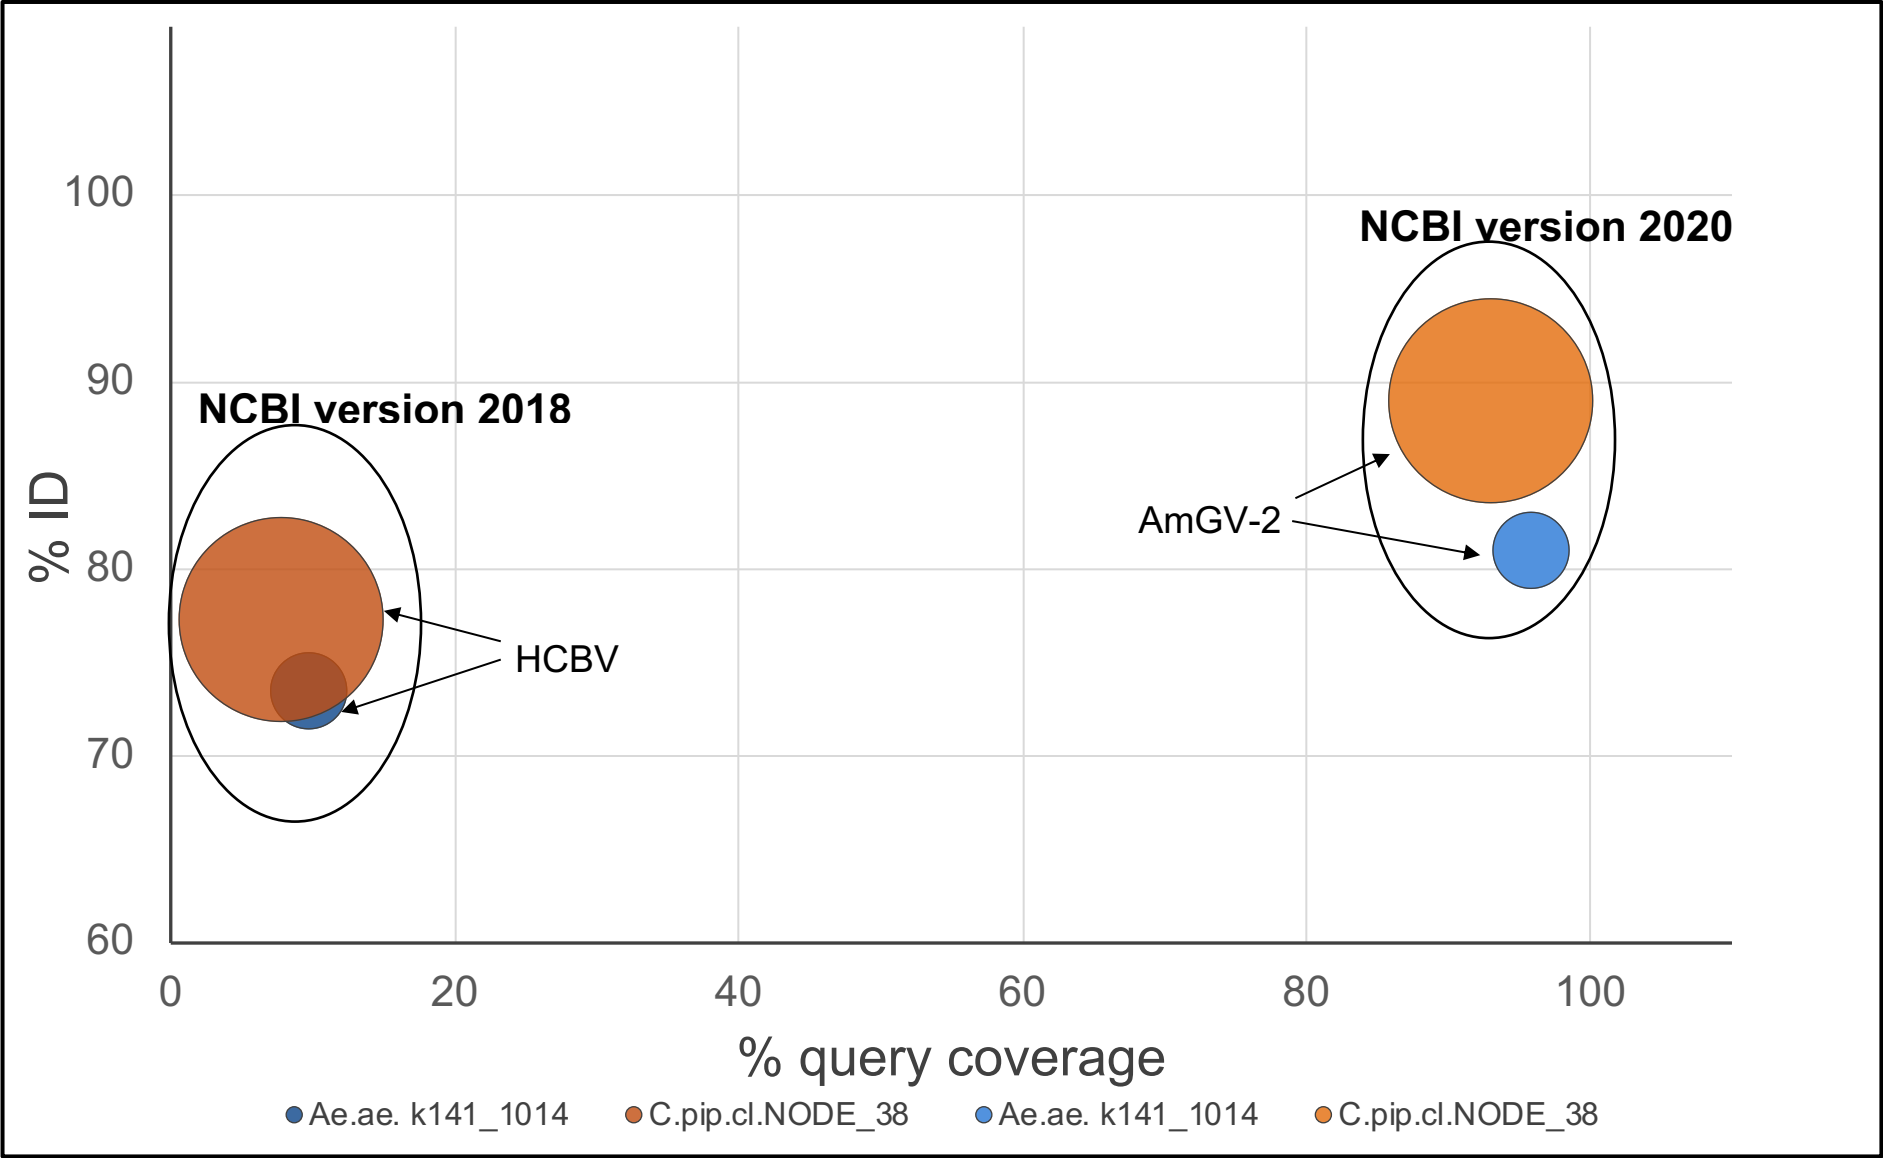

**Figure S7** Goodness of assignment- fit for best BLAST N hit of contig sequence k141\_1014 from *Aedes aegypti* (*Ae.ae.*) metagenome and contig sequence NODE\_38 from *Culex pipiens* complex (*C.pip.cl.*) Barbados (BRB) using NCBI database version 2018 and updated database version 2020;

**Figure S8**

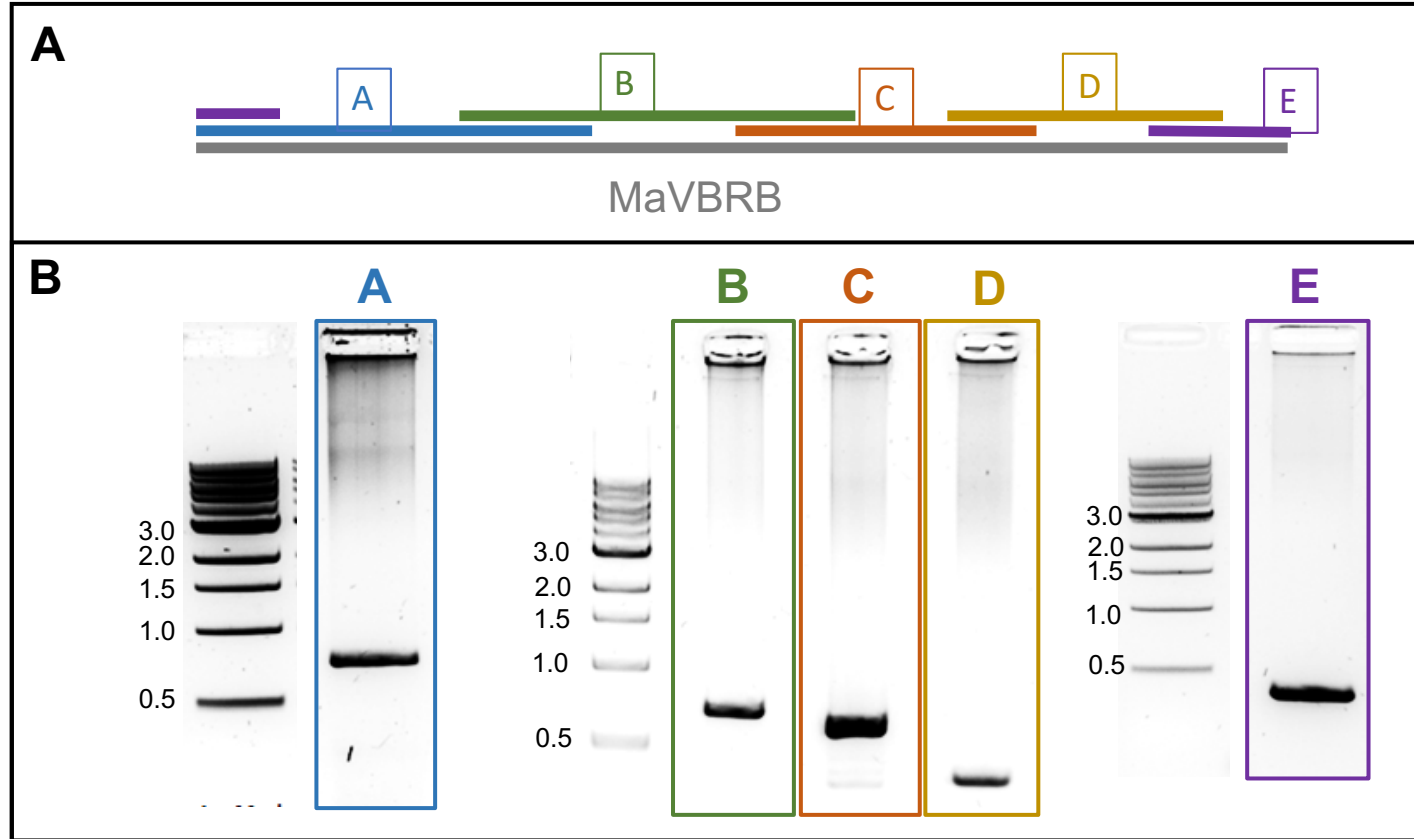

**Figure S8** Verification of metagenomic assembled *mosquito associated virus Barbados* (MaVBRB) genome sequences by abutting primer PCR reactions; **(A)** position of PCRs on genomic virus sequence and **(B)** gel separation of PCR products
