# Supplementary material for: Highly Sensitive Virome Characterization of Aedes aegypti and Culex pipiens Complex from Central Europe and the Caribbean Reveals Potential for Interspecies Viral Transmission
Source: MDPI journal article supplement (doi:10.3390/pathogens9090686), 2020-08-21
Supplement: s1 [file s1]

**Table S4**; best BLAST N hits of model sequence to NCBI database

| ID     | no of mutations | Total Length bp | Total Length Aligned | mean % ID | e-value  | Subject length | % coverage subject | % coverage query | GI         |
|--------|-----------------|-----------------|----------------------|-----------|----------|----------------|--------------------|------------------|------------|
| seq1.1 | 10 Mut          | 100             | 100                  | 90        | 1.00E-28 | 2121           | 4.7                | 100.0            | LK931484.1 |
| seq1.2 | 10 Mut          | 100             | 100                  | 90        | 1.00E-28 | 2121           | 4.7                | 100.0            | LK931484.1 |
| seq1.3 | 10 Mut          | 100             | 99                   | 91        | 4.00E-29 | 2121           | 4.7                | 99.0             | LK931484.1 |
| seq1.4 | 10 Mut          | 100             | 100                  | 90        | 1.00E-28 | 2121           | 4.7                | 100              | LK931484.1 |
| seq1.5 | 10 Mut          | 100             | 98                   | 91        | 1.00E-28 | 2121           | 4.6                | 98               | LK931484.1 |
| seq2.1 | 10 Mut          | 100             | 100                  | 90        | 1.00E-28 | 2121           | 4.7                | 100              | LK931484.1 |
| seq2.2 | 10 Mut          | 100             | 99                   | 91        | 4.00E-29 | 2121           | 4.7                | 99               | LK931484.1 |
| seq2.3 | 10 Mut          | 100             | 100                  | 90        | 1.00E-28 | 2121           | 4.7                | 100              | LK931484.1 |
| seq2.4 | 10 Mut          | 100             | 99                   | 91        | 4.00E-29 | 2121           | 4.7                | 99               | LK931484.1 |
| seq2.5 | 10 Mut          | 100             | 100                  | 90        | 1.00E-28 | 2121           | 4.7                | 100              | LK931484.1 |
| seq1.1 | 15 Mut          | 100             | 91                   | 89        | 1.00E-23 | 2121           | 4.3                | 91.0             | LK931484.1 |
| seq1.2 | 15 Mut          | 100             | 98                   | 86        | 4.00E-22 | 2121           | 4.6                | 98.0             | LK931484.1 |
| seq1.3 | 15 Mut          | 100             | 99                   | 86        | 1.00E-22 | 2121           | 4.7                | 99               | LK931484.1 |
| seq1.4 | 15 Mut          | 100             | 100                  | 85        | 2.00E-21 | 2121           | 4.7                | 100              | LK931484.1 |
| seq1.5 | 15 Mut          | 100             | 98                   | 86        | 4.00E-22 | 2121           | 4.6                | 98               | LK931484.1 |
| seq2.1 | 15 Mut          | 100             | 100                  | 85        | 2.00E-21 | 2121           | 4.7                | 100              | LK931484.1 |
| seq2.2 | 15 Mut          | 100             | 99                   | 86        | 1.00E-22 | 2121           | 4.7                | 99               | LK931484.1 |
| seq2.3 | 15 Mut          | 100             | 100                  | 85        | 2.00E-21 | 2121           | 4.7                | 100              | LK931484.1 |
| seq2.4 | 15 Mut          | 100             | 99                   | 86        | 1.00E-22 | 2121           | 4.7                | 99               | LK931484.1 |
| seq2.5 | 15 Mut          | 100             | 99                   | 86        | 1.00E-22 | 2121           | 4.7                | 99               | LK931484.1 |
| seq1.1 | 20 Mut          | 100             | 91                   | 85        | 3.00E-18 | 2121           | 4.3                | 91.0             | LK931484.1 |
| seq1.2 | 20 Mut          | 100             | 30                   | 93        | 0.19     | 3558314        | 0.0                | 30.0             | AP018533.1 |
| seq1.3 | 20 Mut          | 100             | 99                   | 81        | 1.00E-15 | 2121           | 4.7                | 99               | LK931484.1 |
| seq1.4 | 20 Mut          | 100             | 95                   | 81        | 5.00E-15 | 2121           | 4.5                | 95               | LK931484.1 |
| seq1.5 | 20 Mut          | 100             | 98                   | 81        | 5.00E-15 | 2121           | 4.6                | 98               | LK931484.1 |
| seq2.1 | 20 Mut          | 100             | 76                   | 76        | 1.00E-04 | 2418           | 3.1                | 76               | MF416388.1 |
| seq2.2 | 20 Mut          | 100             | 99                   | 81        | 1.00E-15 | 2121           | 4.7                | 99               | LK931484.1 |
| seq2.3 | 20 Mut          | 100             | 100                  | 80        | 5.00E-15 | 2121           | 4.7                | 100              | LK931484.1 |
| seq2.4 | 20 Mut          | 100             | 99                   | 81        | 1.00E-15 | 2121           | 4.7                | 99               | LK931484.1 |
| seq2.5 | 20 Mut          | 100             | 90                   | 83        | 4.00E-16 | 2121           | 4.2                | 90               | LK931484.1 |
| seq1.1 | 25 Mut          | 100             | 91                   | 79        | 3.00E-11 | 2121           | 4.3                | 91.0             | LK931484.1 |
| seq1.2 | 25 Mut          | 100             | 27                   | 96        | 0.65     | 9342022        | 0.0                | 27.0             | CP022221.1 |
| seq1.3 | 25 Mut          | 100             | 96                   | 77        | 4.00E-10 | 2121           | 4.5                | 96               | LK931484.1 |
| seq1.4 | 25 Mut          | 100             | 95                   | 76        | 6.00E-08 | 2121           | 4.5                | 95               | LK931484.1 |
| seq1.5 | 25 Mut          | 100             | 31                   | 90        | 2.30E+00 | 6257075        | 0.0                | 31               | CP014258.1 |
| seq2.1 | 25 Mut          | 100             | 28                   | 93        | 2.30E+00 | 51955169       | 0.0                | 28               | CP030990.1 |
| seq2.2 | 25 Mut          | 100             | 99                   | 76        | 5.00E-09 | 2121           | 4.7                | 99               | LK931484.1 |
| seq2.3 | 25 Mut          | 100             | 33                   | 91        | 2.30E+00 | 1335           | 2.5                | 33               | 103.1      |
| seq2.4 | 25 Mut          | 100             | 99                   | 76        | 5.00E-09 | 2121           | 4.7                | 99               | LK931484.1 |
| seq2.5 | 25 Mut          | 100             | 82                   | 80        | 1.00E-10 | 2121           | 3.9                | 82               | LK931484.1 |
| seq1.1 | 30 Mut          | 100             | 34                   | 88        | 0.65     | 2121           | 1.6                | 34.0             | 746.1      |
| seq1.2 | 30 Mut          | 100             | 31                   | 90        | 2.3      | 1455109        | 0.0                | 31.0             | AP010947.1 |
| seq1.3 | 30 Mut          | 100             | 82                   | 74        | 1.00E-03 | 2121           | 3.9                | 82               | LK931484.1 |
| seq1.4 | 30 Mut          | 100             | 34                   | 91        | 5.30E-02 | 4979223        | 0.0                | 34               | CP020872.1 |
| seq1.5 | 30 Mut          | 100             | 48                   | 81        | 2.30E+00 | 5370536        | 0.0                | 48               | CP032675.1 |
| seq2.1 | 30 Mut          | 100             | 31                   | 94        | 5.30E-02 | 40226          | 0.1                | 31               | JN954695.1 |
| seq2.2 | 30 Mut          | 100             | 36                   | 86        | 2.30E+00 | 35791275       | 0.0                | 36               | LR537133.1 |
| seq2.3 | 30 Mut          | 100             | 34                   | 91        | 6.50E-01 | 1335           | 2.5                | 34               | 103.1      |
| seq2.4 | 30 Mut          | 100             | 25                   | 100       | 1.90E+01 | 3685408        | 0.0                | 25               | CP002403.1 |
| seq2.5 | 30 Mut          | 100             | 68                   | 81        | 7.00E-07 | 2121           | 3.2                | 68               | LK931484.1 |
| seq1.1 | 35 Mut          | 100             | 25                   | 96        | 7.9      | 2121           | 1.2                | 25.0             | CP029458.1 |
| seq1.2 | 35 Mut          | 100             | 30                   | 93        | 2.3      | 163962         | 0.0                | 30.0             | AC096643.2 |
| seq1.3 | 35 Mut          | 100             | 36                   | 86        | 2.3      | 58651890       | 0.0                | 36               | LR697108.1 |
| seq1.4 | 35 Mut          | 100             | 34                   | 91        | 5.30E-02 | 4979223        | 0.0                | 34               | CP020872.1 |
| seq1.5 | 35 Mut          | 100             | 24                   | 100       | 6.50E-01 | 2241           | 1.1                | 24               | 722.3      |
| seq2.1 | 35 Mut          | 100             | 31                   | 94        | 5.30E-02 | 40226          | 0.1                | 31               | JN954695.1 |
| seq2.2 | 35 Mut          | 100             | 31                   | 90        | 2.30E+00 | 25217654       | 0.0                | 31               | LR584086.1 |
| seq2.3 | 35 Mut          | 100             | 24                   | 100       | 6.50E-01 | 541            | 4.4                | 24               | 817.1      |
| seq2.4 | 35 Mut          | 100             | 26                   | 96        | 2.30E+00 | 92867          | 0.0                | 26               | LN483895.1 |
| seq2.5 | 35 Mut          | 100             | 26                   | 96        | 2.30E+00 | 2639269        | 0.0                | 26               | CP032100.1 |
| seq1.1 | 40 Mut          | 100             | 46                   | 85        | 0.19     | 2121           | 2.2                | 46.0             | 916.1      |
| seq1.2 | 40 Mut          | 100             | 30                   | 90        | 7.9      | 83001952       | 0.0                | 30.0             | LR606182.1 |
| seq1.3 | 40 Mut          | 100             | 33                   | 88        | 2.3      | 2414146        | 0.0                | 33               | LR025083.1 |
| seq1.4 | 40 Mut          | 100             | 34                   | 91        | 5.30E-02 | 4979223        | 0.0                | 34               | CP020872.1 |
| seq1.5 | 40 Mut          | 100             | 24                   | 100       | 6.50E-01 | 2241           | 1.1                | 24               | 722.3      |
| seq2.1 | 40 Mut          | 100             | 44                   | 84        | 2.30E+00 | 2973626        | 0.0                | 44               | CP048401.1 |
| seq2.2 | 40 Mut          | 100             | 32                   | 91        | 6.50E-01 | 25217654       | 0.0                | 32               | LR584086.1 |
| seq2.3 | 40 Mut          | 100             | 39                   | 87        | 6.50E-01 | 39415425       | 0.0                | 39               | LR722987.1 |
| seq2.4 | 40 Mut          | 100             | 26                   | 96        | 2.30E+00 | 92867          | 0.0                | 26               | LN483895.1 |
| seq2.5 | 40 Mut          | 100             | 28                   | 93        | 2.30E+00 | 42360788       | 0.0                | 28               | LR736849.1 |
| seq1.1 | 45 Mut          | 100             | 30                   | 90        | 7.9      | 2121           | 1.4                | 30.0             | LR606195.1 |
| seq1.2 | 45 Mut          | 100             | 23                   | 100       | 2.3      | 3651           | 0.6                | 23.0             | 124.1      |
| seq1.3 | 45 Mut          | 100             | 33                   | 88        | 2.3      | 96089878       | 0.0                | 33               | CP034516.1 |
| seq1.4 | 45 Mut          | 100             | 28                   | 96        | 1.90E-01 | 2187           | 1.3                | 28               | 206.1      |
| seq1.5 | 45 Mut          | 100             | 46                   | 80        | 7.90E+00 | 58051481       | 0.0                | 46               | CP032299.1 |
| seq2.1 | 45 Mut          | 100             | 41                   | 88        | 5.30E-03 | 6343           | 0.6                | 41               | 171.2      |
| seq2.2 | 45 Mut          | 100             | 33                   | 88        | 2.30E+00 | 758            | 4.4                | 33               | 899.1      |
| seq2.3 | 45 Mut          | 100             | 29                   | 93        | 6.50E-01 | 3928141        | 0.0                | 29               | CP013614.1 |
| seq2.4 | 45 Mut          | 100             | 34                   | 88        | 6.50E-01 | 3546           | 1.0                | 34               | 413.1      |
| seq2.5 | 45 Mut          | 100             | 32                   | 91        | 6.50E-01 | 6481972        | 0.0                | 32               | CP045226.1 |
| seq1.1 | 50 Mut          | 100             | 33                   | 88        | 2.3      | 2121           | 1.6                | 33.0             | 322.1      |
| seq1.2 | 50 Mut          | 100             | 31                   | 94        | 0.65     | 1909907        | 0.0                | 31.0             | LT594592.1 |
| seq1.3 | 50 Mut          | 100             | 29                   | 93        | 0.65     | 2464           | 1.2                | 29               | 886.1      |
| seq1.4 | 50 Mut          | 100             | 28                   | 96        | 1.90E-01 | 2187           | 1.3                | 28               | 206.1      |
| seq1.5 | 50 Mut          | 100             | 36                   | 89        | 6.50E-01 | 1563           | 2.3                | 36               | 379.1      |
| seq2.1 | 50 Mut          | 100             | 35                   | 89        | 1.90E-01 | 27778217       | 0.0                | 35               | CP020631.1 |
| seq2.2 | 50 Mut          | 100             | 40                   | 85        | 2.30E+00 | 4305           | 0.9                | 40               | 949.1      |
| seq2.3 | 50 Mut          | 100             | 37                   | 86        | 6.50E-01 | 197071         | 0.0                | 37               | AC244636.2 |
| seq2.4 | 50 Mut          | 100             | 29                   | 93        | 6.50E-01 | 4200651        | 0.0                | 29               | CP047112.1 |
| seq2.5 | 50 Mut          | 100             | 32                   | 91        | 6.50E-01 | 6481972        | 0.0                | 32               | CP045226.1 |
