# Supplementary material for: Highly Sensitive Virome Characterization of Aedes aegypti and Culex pipiens Complex from Central Europe and the Caribbean Reveals Potential for Interspecies Viral Transmission
Source: MDPI journal article supplement (doi:10.3390/pathogens9090686), 2020-08-21
Supplement: s1 [file s1]

**Table S5** Number of CRESS-DNA viruses hits below and above 60% query coverage

|       | hits to CRESS<br>DNA viruses (%) | hits to other<br>viruses (%) | total (%) |
|-------|----------------------------------|------------------------------|-----------|
| >60%  | 15 (34.9)                        | 28 (65.1)                    | 43 (100)  |
| <60%  | 59 (64.9)                        | 32 (35.1)                    | 91 (100)  |
| total | 74 (55.2)                        | 60 (44.8)                    | 134 (100) |
